# Remarkable Suppression of A $\beta$ <sub>42</sub> Protomer-Protomer Dissociation Reaction via Pentamer Dimerization

Ikuo Kurisaki<sup>\*1</sup>, Shigenori Tanaka<sup>\*1</sup>

<sup>1</sup>Department of Computational Science, Graduate School of System Informatics, Kobe

University, 1-1 Rokkodai-cho, Nada-ku, Kobe 657-8501, Japan

\*Ikuo Kurisaki

E-mail: [kurisaki@bear.kobe-u.ac.jp](mailto:kurisaki@bear.kobe-u.ac.jp), Tel: +81-78-803-6472

\*Shigenori Tanaka

E-mail: [tanaka2@kobe-u.ac.jp](mailto:tanaka2@kobe-u.ac.jp), Tel: +81-78-803-6620

## Abstract

Amyloid fibril growth is supposed to be common pathogenic causes for neurodegenerative diseases. This process is triggered by accumulation of fibril-like aggregates, while the minimum size of such aggregates still remains to be elucidated. We addressed this problem with employing atomistic molecular dynamics simulations for the paradigmatic amyloid protein, amyloid- $\beta$  (1-42) ( $A\beta_{42}$ ). Seven different dimeric forms of oligomeric  $A\beta_{42}$  fibril-like aggregate in aqueous solution, ranging from tetramer to decamer, were considered. We found effects of the size of these fibril-like aggregates on their thermodynamic stability and have clarified kinetic suppression of protomer-protomer dissociation reactions even at the point of pentamer dimer formation, where the theoretically estimated reaction time exceeds lifetime of human beings. Recalling that  $A\beta_{42}$  pentamer is found in the range of size of experimentally-observed  $A\beta_{42}$  aggregates, we could suppose that stable formation of fibril-like  $A\beta_{42}$  pentamer species is involved in a turning point where rapid growth of  $A\beta_{42}$  amyloid fibrils is triggered.

Amyloid formation of proteins has been widely observed in biological systems and such aggregate products are classified into the two categories, functional amyloid and pathogenic amyloid.<sup>1</sup> In particular, the latter have drawn much attention because they are supposed as causes of several neurodegenerative diseases, such as Alzheimer and Parkinson diseases.<sup>2</sup>

Since suppression of amyloid formation is considered as practical therapeutic strategy for these serious diseases,<sup>3,4</sup> molecular mechanisms for their formation have been extensively studied.<sup>5-7</sup> It is supposed that amyloid fibril formation proceeds via the consecutive three phases. Firstly, monomers assemble to make repertoire of oligomers; a part of oligomers assumes fibril-like, growth-competent aggregates referred to as growth nuclei (lag phase).<sup>8,9</sup> Secondly, growth nuclei species associate with each other to make larger protofibrils while they convert natively folded monomers into growth-competent monomers to enhance rapid fibril formation (growth phase). Finally, fibril growth processes are balanced with fibril decomposition processes, then reaching thermal equilibrium and completing fibril formation (plateau phase).

In particular, the progress from lag phase to growth phase plays a critical role in an amyloid fibril formation. Sufficient amounts of growth nuclei species are formed in the lag phase<sup>10</sup>, then triggering amyloid fibril growth<sup>9</sup>. The molecular entity of growth nuclei

is regarded as fibril-like aggregates.<sup>9</sup> Thus clarifying the minimum size of thermodynamically stable fibril-like aggregates, which can be involved in amyloid fibril growth, is a landmark to understand molecular mechanisms for the shift from lag phase to growth phase.

In this context, earlier studies on amyloid- $\beta$  (1-42) ( $A\beta_{42}$ ) have discussed the functional roles of oligomeric aggregates as growth nuclei in amyloid fibril growth, for example.<sup>11-13</sup> Nonetheless, the minimum size of growth nuclei species remains to be elucidated even for the paradigmatic amyloid protein. Solving the problem appears to be difficult due to molecular diversity of  $A\beta_{42}$  aggregates found in lag phase<sup>14-17</sup>. It is still challenging for experimental approaches to separately examine physicochemical characters of individual oligomeric aggregate species.

Then, we address to reach the landmark knowledge with employing atomistic molecular dynamics simulations. This study starts from confirming the conjecture made in our earlier study<sup>18</sup>:  $A\beta_{42}$  protomer growth results in suppression of conformational fluctuation such as inter- $A\beta_{42}$  protomer twisting and then thermodynamically stabilizes  $A\beta_{42}$  fibril-like aggregates. The seven  $A\beta_{42}$  protomer dimers in aqueous solution are considered as models of  $A\beta_{42}$  fibril-like aggregates, where the size of  $A\beta_{42}$  protomer ranges from tetramer to decamer. We thus examine conformational fluctuation and

dissociation free energies of these  $A\beta_{42}$  protomer dimers, aiming to identify the minimum species of irreversibly formed fibril-like  $A\beta_{42}$  aggregate within mean lifetime of human beings.

We then observed kinetic suppression of protomer-protomer dissociation reactions even for  $A\beta_{42}$  pentamer dimer. It is noted that  $A\beta_{42}$  pentamer is found in the range of size of experimentally-observed soluble  $A\beta_{42}$  oligomers<sup>11,19</sup> and such small oligomeric aggregates are supposed to promote amyloid fibril formation by functioning as secondary nucleation competent aggregates<sup>11</sup>. Our observation then suggests that stable formation of this protomer species is involved in a turning point in  $A\beta_{42}$  amyloid fibril formation processes, then giving an important clue toward comprehensive understanding of microscopic mechanisms for shift from the lag phase to the growth phase.

## **Materials and Methods**

### **Setup of amyloid- $\beta$ (1-42) protomer dimer systems**

We used the cryo-electron microscopy (cryo-EM) structure (PDB entry: 5OQV<sup>20</sup>) to construct amyloid- $\beta$  (1-42),  $A\beta_{42}$ , protomer dimer systems; a protomer denotes an  $A\beta_{42}$  oligomer composed of  $A\beta_{42}$  monomers with growth-competent conformation. We selected this structure by considering the relationship with our earlier study<sup>18</sup>.

Here we consider dimer of  $N$ -mer  $A\beta_{42}$  protomer as the model of fibril-like aggregate, where the value of  $N$  ranges 4 to 10 (**Figure 1**). Each of the seven models is annotated by  $A\beta_{42}(N:N)$  or simply  $N:N$ , hereafter.  $N\epsilon$  protonation state was employed for each of histidine residues, and all carboxyl groups in aspartate and glutamate residues were set to the deprotonated state. Employing each of the seven  $A\beta_{42}(N:N)$ , we prepared seven  $A\beta_{42}$  protomer dimer systems, whose annotations and molecular components are summarized in **Table 1**. Since we are interested in relationship between size and thermodynamic stability for these  $A\beta_{42}$  protomers, no biological co-solutes were added into aqueous solution except for the counter ions to electronically neutralize these molecular systems. The additional detail for system construction is described in Supporting Information (see **SI-1**).

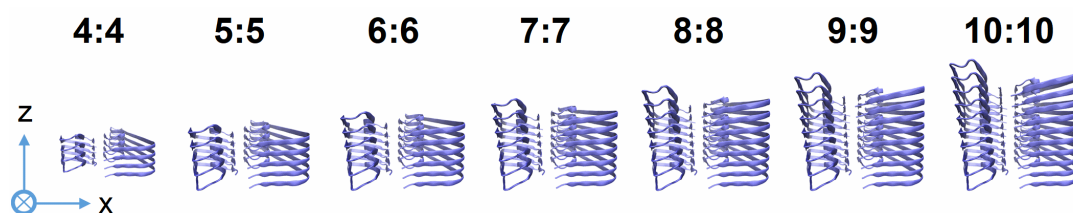

**Figure 1.** Molecular structures of  $A\beta_{42}$  protomer dimers. Each of two integers separated by colon denotes the number of  $A\beta_{42}$  monomer in the protomer. The X and Z axes are shown on this plane. The cross in circle denotes Y-axis which directs from this surface to the back.

**Table 1.** Molecular components of A $\beta$ <sub>42</sub> protomer dimer systems employed for the molecular dynamics simulations.

| size of A $\beta$ <sub>42</sub> protomer | number of K <sup>+</sup> cations | number of water molecules | box axis length [Å] |       |       |
|------------------------------------------|----------------------------------|---------------------------|---------------------|-------|-------|
|                                          |                                  |                           | x                   | y     | z     |
| 4                                        | 24                               | 33406                     | 138.4               | 104.2 | 78.4  |
| 5                                        | 30                               | 35679                     | 139.1               | 105.4 | 83.3  |
| 6                                        | 36                               | 38153                     | 139.8               | 106.0 | 87.7  |
| 7                                        | 42                               | 41156                     | 140.5               | 106.9 | 92.5  |
| 8                                        | 48                               | 42498                     | 140.6               | 107.4 | 96.8  |
| 9                                        | 54                               | 44855                     | 141.5               | 108.4 | 101.7 |
| 10                                       | 60                               | 46828                     | 141.6               | 109.2 | 106.4 |

To calculate the forces acting among atoms, AMBER force field 14SB<sup>21</sup>, TIP3P water model<sup>22,23</sup>, and JC ion parameters adjusted for the TIP3P water model<sup>24,25</sup> were used for amino acid residues, water molecules, and ions, respectively. Molecular modeling of each A $\beta$ <sub>42</sub>(N:N) system was performed using the LEaP modules in AmberTools 17 package<sup>26</sup>.

## Simulation setup

Molecular mechanics (MM) and molecular dynamics (MD) simulations were performed under the periodic boundary condition with GPU-version PMEMD module in AMBER 17 package<sup>26</sup> based on SPFP algorithm<sup>27</sup> with NVIDIA GeForce GTX1080 Ti.

Electrostatic interaction was treated by the Particle Mesh Ewald method, where the real space cutoff was set to 9 Å. The vibrational motions associated with hydrogen atoms were frozen by SHAKE algorithm through MD simulations. The translational center-of-mass motion of the whole system was removed by every 500 steps to keep the whole system around the origin, avoiding an overflow of coordinate information from the MD trajectory format. These simulation conditions mentioned above were common in all of the simulations discussed in this manuscript.

## **Unbiased molecular dynamics simulation**

Following temperature relaxation NVT simulations, 30-ns NPT MD simulations (300 K, 1 bar) were performed and used for following analyses. The system temperature and pressure were regulated with Berendsen thermostat<sup>28</sup> with a 5-ps of coupling constant and Monte Carlo barostat with attempt of system volume change by every 100 steps, respectively. A set of initial atomic velocities was randomly assigned from the Maxwellian distribution at 0.001 K at the beginning of the NVT simulations. The time step of integration was set to 2 fs. For each A $\beta$ <sub>42</sub> fibril system, this simulation procedure was repeated thirty times by assigning different initial atomic velocities. The further details are shown in Supporting Information (see **SI-2**).



## Steered and umbrella sampling molecular dynamics simulations

Dissociation processes of A $\beta$ <sub>42</sub> monomer or A $\beta$ <sub>42</sub> protomer were described by combining a steered molecular dynamics (SMD) simulation with umbrella sampling molecular dynamics (USMD) simulations. The definitions for reaction coordinates for both SMD and USMD simulations are given in Results and Discussion section.

SMD was employed to dissociate an A $\beta$ <sub>42</sub> monomer or protomer from the remaining part of A $\beta$ <sub>42</sub>(N:N). 0.25-ns SMD simulation was carried out under constant NPT condition (300 K, 1 bar), where the system temperature and pressure were regulated by Langevin thermostat with 1-ps<sup>-1</sup> collision coefficient, and Monte Carlo barostat with attempt of system volume change by every 100 steps, respectively. The value of reaction coordinate was gradually changed through the SMD simulations by imposing the harmonic potential with the force constant of 100 kcal/mol/Å<sup>2</sup>.

Then, certain numbers of snapshot structures were extracted from the SMD trajectory and employed for USMD windows. Following temperature relaxation simulations, several nanosecond NVT USMD simulations (300 K) were performed for each of the USMD windows (**Table S1** and **Tables S2-3** in Supporting Information for A $\beta$ <sub>42</sub> protomer dissociation and A $\beta$ <sub>42</sub> monomer dissociation, respectively). The system temperature was

regulated using Langevin thermostat with  $1\text{-ps}^{-1}$  collision coefficient. Each of the last 1-ns USMD trajectories was used to construct a potential of mean force.

This combined SMD-USMD procedures are repeated eight times for each  $A\beta_{42}$  protomer dimer system. Sets of initial atomic coordinates for SMD simulations were randomly selected from the thirty set of unbiased 30-ns NPT MD simulations without allowing duplication. The further details are illustrated in Supporting Information (see **SI-3**).

## Trajectory analyses

Dihedral angle, hydrogen bond (HB) formation and root mean square deviation (RMSd) were calculated with the cpptraj module in AmberTools 17 package<sup>26</sup>. We calculated RMSd to the cryo-EM derived  $A\beta_{42}$  protomer dimer structure<sup>20</sup> using the backbone heavy atoms (i.e.,  $C_{\alpha}$ , N, C and O). The geometrical criterion of HB formation is as follows: H-X distance was  $< 3.5 \text{ \AA}$  and X-H-Y angle was  $> 120^{\circ}$ , where X, Y and H denote acceptor, donor and hydrogen atoms, respectively.

Each set of USMD trajectories was used to calculate potential of mean force (PMF) with Weighed Histogram Analysis Method (WHAM)<sup>29,30</sup>. Statistical errors of PMF values,  $\sigma_{PMF}(\xi)$ , were estimated by employing bootstrapped sampling<sup>31</sup>:

$$\sigma_{PMF}(\xi) = \left[ (N_b - 1)^{-1} \sum_{k=1}^{N_b} (W_{b,k}(\xi) - \langle W_b(\xi) \rangle)^2 \right]^{\frac{1}{2}} \quad (1)$$

Here,  $N_b$ ,  $\xi$ , and  $W_{b,k}(\xi)$  denote the number of bootstrapped sampling, the reaction coordinate and the value of  $k^{\text{th}}$  bootstrapped potential of mean force at each point of  $\xi$ , respectively.  $\langle W_b(\xi) \rangle$  is average over all  $W_{b,k}(\xi)$ , where the value of  $N_b$  is set to 200.

Reaction rate,  $k_{TST}$ , is estimated by using Eyring's transition state theory:

$$k_{TST} = \frac{k_B T}{h} \exp\left(\frac{-\Delta F^\ddagger}{k_B T}\right) \quad (2)$$

Here,  $\Delta F^\ddagger$ ,  $h$ ,  $k_B$  and  $T$  denote an activation barrier height, Planck constant, Boltzmann constant and a temperature of system, respectively. Reaction time scale,  $\tau_{TST}$ , is defined as the inverse of  $k_{TST}$ .  $\Delta F^\ddagger$  is defined as  $F(\xi_0') - F(\xi_0)$ , where PMF has local minimum at  $\xi_0$ , and gradient of PMF turns from positive to negative values at  $\xi_0'$ , which is greater than  $\xi_0$ . The estimation with employing Eq. 2 is supposed to be an upper bound of the reaction rate (or a lower bound of the reaction time)<sup>32,33</sup> and we accordingly remarked the influence on each of observations we obtained (see related discussion in Results and Discussion section).

Molecular structures were illustrated using Visual Molecular Dynamics (VMD).<sup>34</sup>

Error bars are calculated from standard error and indicate 95% confidence interval if there is no annotation.

## Results and Discussion

### Inter-A $\beta_{42}$ protomer twisting is suppressed through fibril growth

We examined conformational fluctuation of A $\beta_{42}$  protomer dimers under thermal equilibrium by employing each thirty sets of 30-ns unbiased NPT MD simulations.

**Figure 2** shows time-course change of averaged RMSd values for A $\beta_{42}$  protomer dimers.

Larger protomer dimers have smaller converged RMSd values, suggesting suppression of conformational fluctuation through increasing sizes of protomers. For each of the seven

systems, it can be considered that the values reach equilibrium after 20 ns. A $\beta(4:4)$  system

shows relatively large RMSd fluctuation compared with the other six systems.

Nonetheless, the fluctuation is in magnitude of c.a. 0.2 Å within the time domain and

seems smaller than atomic scales, then possibly being insignificant. Accordingly, we

employed partial MD trajectories in the period after 20 ns for following analyses.

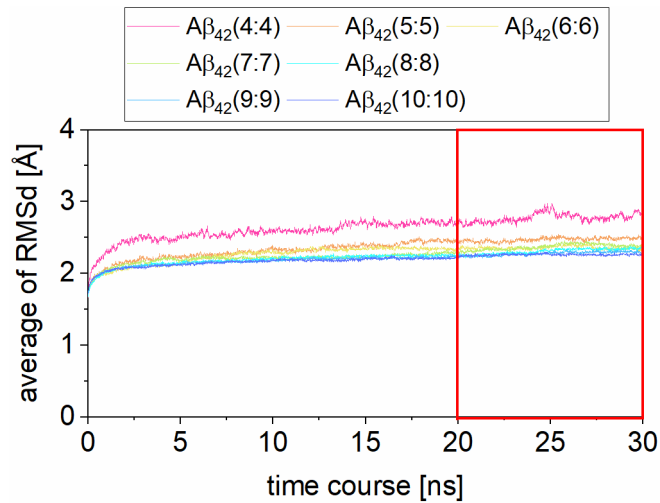

**Figure 2.** Time-course analyses of root mean square deviation (RMSd). Each result of Aβ<sub>42</sub> protomer dimer systems is distinguished by color. The time domain supposed as convergence is indicated by the red rectangle.

We characterize conformational fluctuation of Aβ<sub>42</sub> protomer dimer by using the inter-Aβ<sub>42</sub> protomer twisting angle ( $\theta_T$ ) (**Figure 3A**). This  $\theta_T$  is defined as the dihedral angle in the manner similar to that in our earlier study<sup>18</sup>. **Table 2** gives statistical analyses for values of  $\theta_T$  calculated for each of the seven systems. We could not find significant difference in averaged value of  $\theta_T$  among the seven systems. Meanwhile, standard deviation (S. D.) reflects the effect of protomer size; Aβ<sub>42</sub>(4:4) shows larger S. D. of  $\theta_T$  than the other systems.

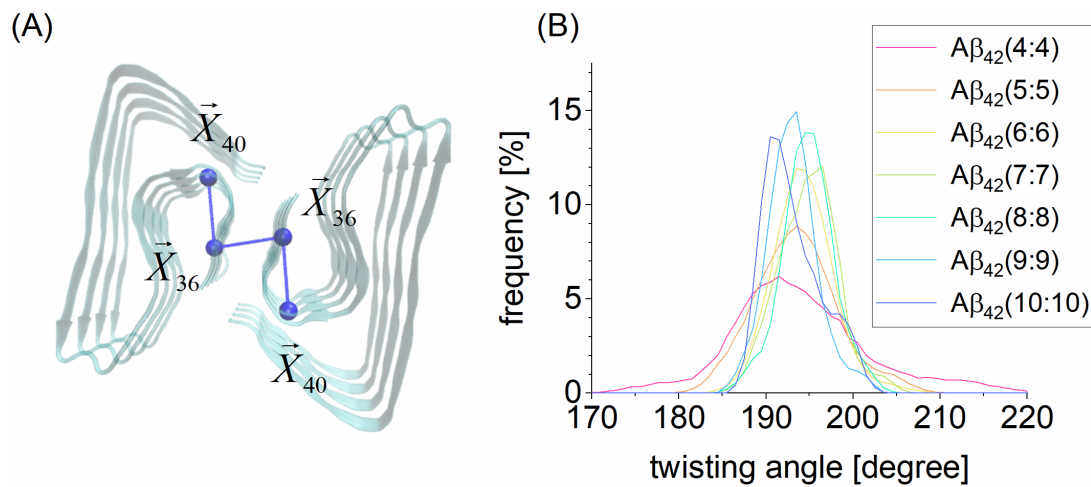

**Figure 3.** Inter- $A\beta_{42}$  protomer twisting angle. (A) illustration of the twisting angle. (B) twisting angle distributions for each  $A\beta_{42}$  protomer dimer system. In panel A,  $\vec{X}_m$  denotes the coordinate averaged for the  $C_\alpha$  atoms of the  $m^{\text{th}}$  residues in a  $A\beta_{42}$  monomer over the protomer (shown with blue ball);  $A\beta_{42}(4:4)$  is illustrated here as an example. In panel B, each result of  $A\beta_{42}$  protomer dimer systems is distinguished by color, and bin width is set to  $1^\circ$ .

**Table 2.** Statistical analyses of inter- $A\beta_{42}$  protomer twisting angle.

| $A\beta_{42}$ protofibril model system | twisting angle [deg.]         |        |
|----------------------------------------|-------------------------------|--------|
|                                        | average $\pm 2 \times$ S. E.* | S. D.* |
| $A\beta_{42}(4:4)$                     | $193.9 \pm 2.6$               | 7.1    |
| $A\beta_{42}(5:5)$                     | $193.5 \pm 1.5$               | 4.0    |
| $A\beta_{42}(6:6)$                     | $194.3 \pm 1.1$               | 2.9    |
| $A\beta_{42}(7:7)$                     | $194.9 \pm 1.1$               | 2.9    |
| $A\beta_{42}(8:8)$                     | $194.8 \pm 1.0$               | 2.7    |
| $A\beta_{42}(9:9)$                     | $193.1 \pm 1.0$               | 2.7    |
| $A\beta_{42}(10:10)$                   | $193.1 \pm 1.2$               | 3.2    |

\*S. E. and S. D. denote standard error and standard deviation, respectively.

Dependence of the S. D. on protomer size can be further clarified by showing the shapes of the distributions of  $\theta_r$  (**Figure 3B**). That for A $\beta_{42}$ (4:4) shows longer tails (the S.D. value is 7.0 [deg.]) than those for other systems. Comparing A $\beta_{42}$ (5:5) with A $\beta_{42}$ (4:4), the S. D. value shows 1.75-fold decrease, for example. We can find further localization of distributions for larger A $\beta_{42}$  protomer dimers, whose S. D. values are c.a. 3.0 [deg.]. These observations clearly indicate that increasing the size of A $\beta_{42}$  protomer results in suppression of inter-protomer rotation. This result validates the former part of our hypothesis.

### **Increase of hydrogen bond formation between the protomers additively changes the height of free barrier of protomer dissociation reaction**

We test the latter part of our hypothesis that suppressing conformational fluctuation of A $\beta_{42}$  protomer dimer actually enhances thermodynamic stability of the protomer dimer. A potential of mean force (PMF) was calculated for each of protomer-protomer dissociation reactions, where the distance between centers of mass for each protomer is employed as the reaction coordinates (see **Figure 4A** for the definition).

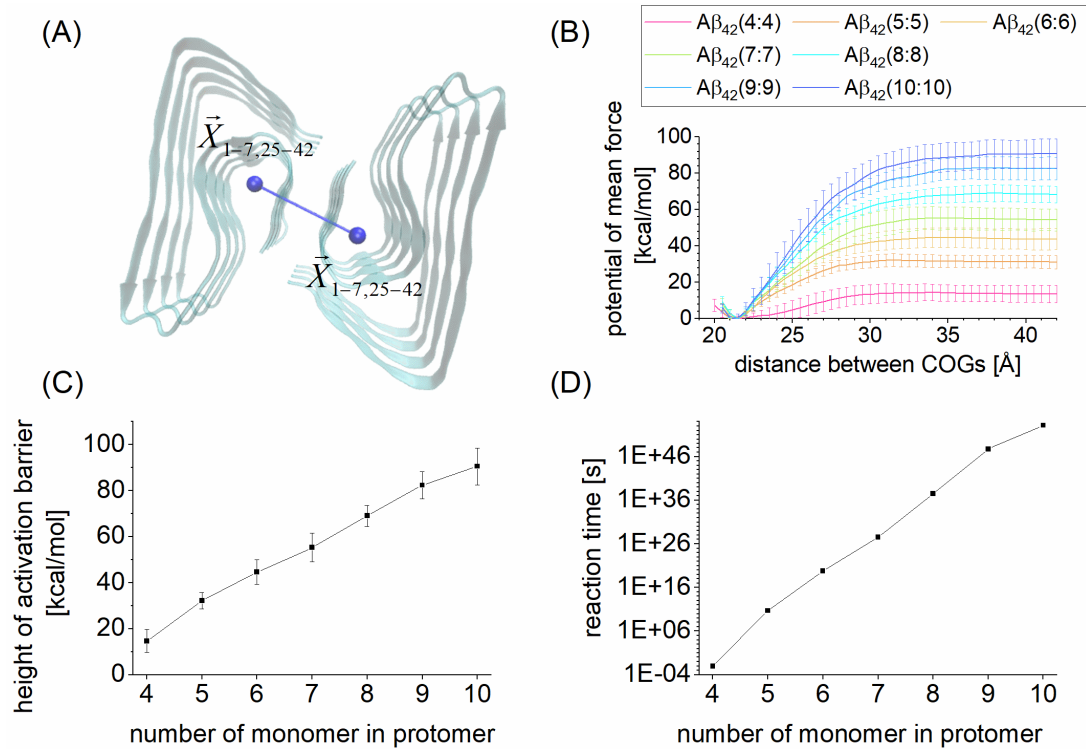

**Figure 4.** Analyses for Aβ<sub>42</sub> protomer-protomer dissociation reaction. (A) Illustration of reaction coordinate. (B) Potential of mean forces (PMFs). (C) Height of activation barrier obtained from the PMFs. (D) Reaction time evaluated with Eyring's transition state theory. In panel A,  $\vec{X}_{m-n,s-t}$  denotes the averaged coordinate (shown with blue ball), which is calculated for the (n-m+1) C<sub>α</sub> atoms of the m<sup>th</sup>, m+1<sup>th</sup> ... n<sup>th</sup> and s<sup>th</sup>, s+1<sup>th</sup> ... t<sup>th</sup> residues in the protomer, and the case of Aβ<sub>42</sub>(4:4) is illustrated here as an example. In panel B, each of Aβ<sub>42</sub> protomer dimer systems is distinguished by color. Error bars denote 95% confidence interval.

As shown in **Figure 4B**, each of the PMFs has one activation barrier toward the



dissociation direction, appearing to be uphill. Furthermore, the height of activation barrier clearly increases with the size of protomer, thus corroborating the latter part of our hypothesis (**Figure 4C**).

This change can be explained by considering the number of hydrogen bond (HB) formation between the protomers. **Figure 4C** and **Figure 5A** show the height of activation barrier and the number of inter-A $\beta_{42}$  protomer HB, respectively. We can find that both of these two quantities additively change according to protomer size and it could thus be said that increase of the protomer size directly contributes to enthalpic stabilization of A $\beta_{42}$  protomer dimers and suppresses inter-protomer rotation.

It is worthwhile to note that the number of hydrogen bond formation per A $\beta_{42}$  monomer ( $n_{monomer}^{HB}$ ) seems to converge up to A $\beta_{42}$ (8:8) (**Figure 5B**):  $n_{monomer}^{HB}$  shows monomer size-dependent, *extensive* property by A $\beta_{42}$ (7:7), while it converts into monomer size-independent *intensive* variable from A $\beta_{42}$ (8:8). This observation let us suggest that A $\beta_{42}$ (8:8) is a boundary where a flexible fibril-like aggregate converts into solid A $\beta_{42}$  protofibril structure.

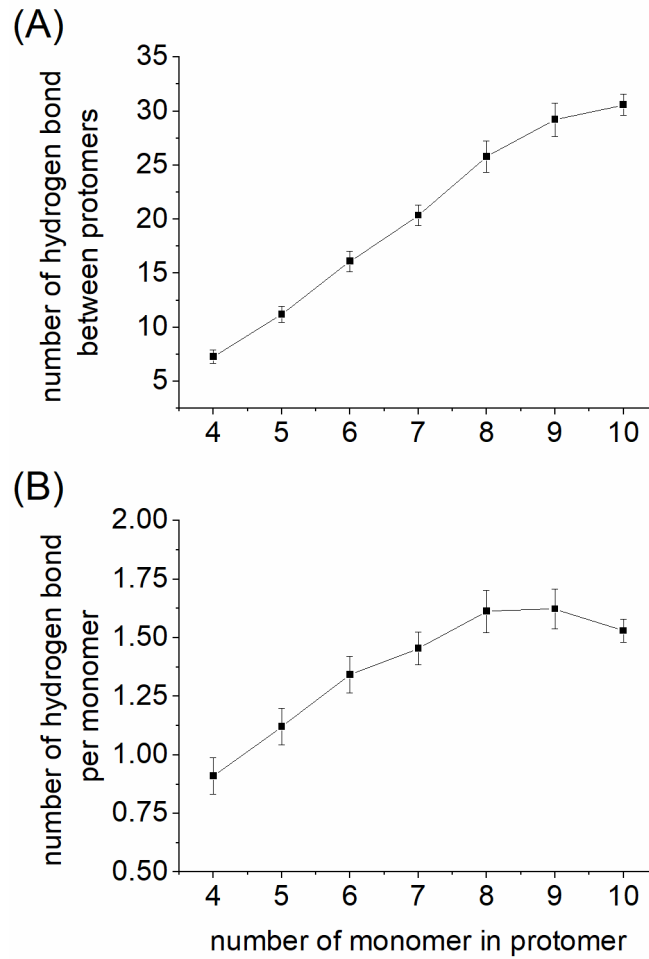

**Figure 5.** Hydrogen bond (HB) formation between  $A\beta_{42}$  protomers. (A) whole number of the HB. (B) the number of HB divided by the number of  $A\beta_{42}$  monomer in the  $A\beta_{42}$  protomer dimer. Error bars denote 95% confidence interval.

### **Protomer-protomer dissociation reaction is remarkably suppressed at the point of $A\beta_{42}$ pentamer formation**

Using the heights of activation barriers calculated above, we estimated the time scale of protomer dissociation reactions ( $\tau$  [s]) (**Figure 4D**). From the biological point of view, it is worthwhile discussing the difference between that of  $A\beta_{42}(4:4)$  and  $A\beta_{42}(5:5)$ , in

particular. According to our estimations with Eyring's transition state theory, the value of  $\tau$  for  $A\beta_{42}(4:4)$  is 8.8 ms which falls into timescales of cellular processes, while that for  $A\beta_{42}(5:5)$  is 1680 year which is much longer than mean lifetime of human being. This reaction time estimation denotes that the protomer-protomer dissociation reaction is kinetically suppressed in decomposition processes of  $A\beta_{42}(5:5)$  and also in those of greater protomer dimers.

Since Eyring's transition state theory would often underestimate reaction timescales,<sup>32,33</sup> correction of such underestimation might indicate that oligomeric species smaller than  $A\beta_{42}(5:5)$ , *e.g.*,  $A\beta_{42}(4:4)$ , show suppression of inter-protomer dissociation as well. Nonetheless, the observation results for suppression of inter- $A\beta_{42}$  protomer dissociation within mean lifetime of human being would remain unchanged essentially.

The above insight, which is obtained by considering the seven model systems of  $A\beta_{42}$  fibril-like aggregate under the solvated conditions, supports our conjecture that increasing size of protomer contributes to thermodynamic stability of fibril-like aggregates. Furthermore, suppression of protomer-protomer dissociation route is found for the relatively small protomer dimer,  $A\beta_{42}(5:5)$ .

The recent experimental studies reported that the number of subunits in soluble  $A\beta_{42}$  aggregates ranges from 4 to 8<sup>11,19</sup>. Besides, such smaller oligomer species are supposed

to be secondary nucleation competent fibril-like aggregates which can convert natively folded monomers into growth-competent monomers.<sup>11</sup> Recalling these two experimental evidences, we could suppose that stable formation of fibril-like A $\beta$ <sub>42</sub> pentamer species activates secondary nucleation processes, generates additional fibril-like oligomers and accumulates growth nuclei species via dimeric association of this protomer species. This step seems to be involved in an important turning point where the growth phase proceeds from the lag phase.

### **A $\beta$ <sub>42</sub> pentamer and its dimeric form may appear without regard to monomer dissociation from the edge of a protomer dimer**

It can be assumed that increase of protomer size similarly suppresses an alternative route of A $\beta$ <sub>42</sub> aggregate decomposition, that is, A $\beta$ <sub>42</sub> monomer dissociation from the edges of protomers. To examine effects of protomer size on the alternative dissociation route, we analyzed thermodynamic stability of A $\beta$ <sub>42</sub> monomer on the protomer edge. We calculated potential of mean forces for monomer dissociations from A $\beta$ <sub>42</sub>(4:4) and A $\beta$ <sub>42</sub>(10:10) (**Figure 6A** and **6B**), the smallest and largest protomer dimers examined in this study, respectively. Besides, recalling that the smallest A $\beta$ <sub>42</sub> fibril species is composed of 8 monomers or fewer<sup>11</sup>, we suppose that A $\beta$ <sub>42</sub>(10:10) is sufficient in size as a model of

A $\beta_{42}$  fibril species.

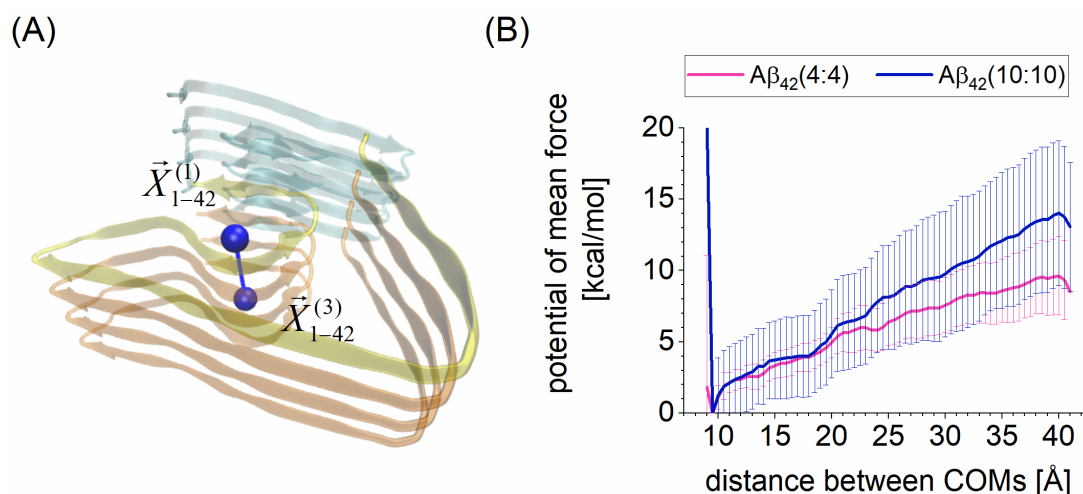

**Figure 6.** Analyses for A $\beta_{42}$  monomer dissociation reaction. (A) Illustration of reaction coordinate. (B) Potential of mean forces (PMFs). In panel A,  $\vec{X}_{m-n}^{(l)}$  denotes the averaged coordinate (shown with blue ball), which is calculated for the  $(n-m+1)$  C $_{\alpha}$  atoms of the  $m^{\text{th}}$ ,  $m+1^{\text{th}}$  ...  $n^{\text{th}}$  residues for  $l$  monomers in the protomer, and the case of A $\beta_{42}(4:4)$  is illustrated here as an example. The dissociated monomer and the neighboring trimer is colored by transparent yellow and blue, respectively. In panel B, each of A $\beta_{42}$  fibril-like aggregate systems is distinguished by color. Error bars denote 95% confidence interval.

Each of the PMFs has one activation barrier toward the dissociation direction and the height of activation barrier appears to increase with the size of protomer. However, the effects of size are not substantial compared with the case of protomer-protomer

dissociation (see **Figure 4**). The estimated reaction times are 1.6  $\mu$ s and 5.9 ms for  $A\beta_{42}(4:4)$  and  $A\beta_{42}(10:10)$ , respectively.

As discussed above, Eyring's transition state theory would often underestimate the reaction time scales<sup>32,33</sup>. Then we here expect how much the values of timescale increase with underestimation correction by referring to earlier kinetic studies on other biomacromolecular processes<sup>35-37</sup>. Their underestimation corrections range from  $10^1$ - to  $10^6$ -fold. If we consider the correction for  $A\beta_{42}(10:10)$  at maximum, the timescale becomes 590 seconds. Meanwhile, the value is still within cellular timescales even for the model of  $A\beta_{42}$  fibril species,  $A\beta_{42}(10:10)$ . It thus remains unclear so far whether  $A\beta_{42}$  monomer dissociation reactions prevents stable formation of  $A\beta_{42}$  amyloid fibril species.

Under this circumstance, it is worthwhile noting the kinetic reaction study by Cohen and co-workers.<sup>6</sup> They reported that  $A\beta_{42}$  amyloid fibril formation proceed even if  $A\beta_{42}$  monomers can be dissociated from  $A\beta_{42}$  fibril species in their kinetic reaction scheme. They gave the reaction timescale of 100 seconds, which is still fallen within cellular timescales and similar in the magnitude to our estimation with the maximum correction. These dissociation reactions may not critically prevent stable formation of  $A\beta_{42}$  fibril species.

Additionally, the other experimental study reported presence of oligomeric  $A\beta_{42}$  fibril

aggregate, where the smallest species is composed of 8 A $\beta$ <sub>42</sub> monomers or fewer<sup>11</sup>. The above PMF analyses indicate that A $\beta$ <sub>42</sub> protomer size has lesser influence on monomer dissociation from the edge of a protomer dimer; the reaction time scales are still fallen within cellular timescales. Nonetheless, according to the two earlier experimental studies, we can still assume that A $\beta$ <sub>42</sub> pentamer and the dimeric form, A $\beta$ <sub>42</sub>(5:5), emerge in the process of A $\beta$ <sub>42</sub> amyloid fibril formation and function as a growth nuclei species.

The above discussion raises a new question which brings us further insights into molecular mechanisms for A $\beta$ <sub>42</sub> growth nuclei formation. It is noted that the values calculated from our simulations for A $\beta$ <sub>42</sub>(10:10) is smaller by c.a. 10<sup>5</sup> fold than Cohen's estimation<sup>6</sup>. We can suppose the two factors to explain this underestimation for the reaction timescale. One is the usage of Eyring's transition state theory, as expected.<sup>32,33</sup> As referred to above, the maximally corrected value is similar to Cohen's estimation. On the other hand, magnitude of correction appears to strongly depend on molecular processes<sup>35-37</sup> and then there is room to discuss whether the underestimation is simply due to the usage of Eyring's transition state theory.

The other possible factor is atomistic interaction of A $\beta$ <sub>42</sub> fibril-like aggregates with molecular environments. The present study was designed to confirm our conjecture about the significant effect of sizes of A $\beta$ <sub>42</sub> protomer on thermodynamic stability of A $\beta$ <sub>42</sub> fibril-

like aggregates, where isolated  $A\beta_{42}$  protomer dimers was placed in aqueous solution. Meanwhile, the earlier studies reported fibril-like aggregate formation accompanied by the molecular crowding of  $A\beta_{42}$  molecules.<sup>12,13,38</sup>  $A\beta_{42}$  crowding may surround an  $A\beta_{42}$  monomer on the edge of the  $A\beta_{42}$  protomer dimer and configurationally restrict the dissociation pathway, then increasing free energy barrier of the dissociation reaction and supporting the stable formation of minimum  $A\beta_{42}$  growth nuclei species.

The later possibility is in particular worth considering preferentially due to the evidence from the experimental observations about  $A\beta_{42}$  fibril-like aggregate formation. However, further investigation for this problem is beyond the scope of this study, thus being left for future study.

## Concluding Remarks

Clarifying minimum size of growth-competent aggregates is a landmark knowledge to understand molecular mechanisms for amyloid fibril formation. In this context, we considered a paradigmatic amyloid protein,  $A\beta_{42}$ , and examined effects of the protomer size on thermodynamic stability of the protomer dimers. We elucidated that even dimer formation of  $A\beta_{42}$  pentamer kinetically suppresses this protomer-protomer dissociation within mean lifetime of human being.



Our observation about A $\beta$ <sub>42</sub> pentamer dimer appears to be worth noting when we examine how the growth phase proceeds from the lag phase. A $\beta$ <sub>42</sub> pentamer is found in the range of size of experimentally-observed soluble A $\beta$ <sub>42</sub> oligomers<sup>11,19</sup>, which are supposed to be secondary nucleation competent aggregates<sup>11</sup>. Recalling these experimental evidences, we could suppose that stable formation of A $\beta$ <sub>42</sub> pentamer is involved in an important turning point where the growth phase proceeds from the lag phase, the important reaction step in progress of A $\beta$ <sub>42</sub> amyloid fibril growth.

We have here discussed A $\beta$ <sub>42</sub> protomer systems, while our theoretical approach can be applicable to studies under different physicochemical conditions and to studies on polymorphism of A $\beta$  species<sup>17</sup> and other pathogenic amyloid proteins such as prion<sup>39</sup>,  $\alpha$ -synuclein<sup>40</sup> and fused in sarcoma (FUS)<sup>41</sup>. Free energy analyses for these proteins could give a similar observation that dimeric association of oligomeric protomer species is sufficient to suppress protomer-protomer dissociation route in the decomposition process. Meanwhile it can be assumed that each amyloid protein shows its characteristic protomer size due to the own atomic structure of amyloid fibril-like aggregate.

Our study has started to clarify a significant effect of sizes of A $\beta$ <sub>42</sub> protomer on thermodynamic stability of A $\beta$ <sub>42</sub> fibril-like aggregates and then gives a suggestion for an additional key factor for stable formation of minimum A $\beta$ <sub>42</sub> growth nuclei species. The

role of this factor will be examined in future study by considering the effects of molecular crowding milieu on formation of relatively small protomer dimer such as  $A\beta_{42}(5:5)$  as a model of growth nuclei species.

## **Supporting Information**

The Supporting Information is available free of charge on the ACS Publications website.

Detailed procedures for unbiased MD, SMD and USMD simulations, Figures and Tables for analyses of these simulations.

## **Acknowledgements**

This work was supported by a Grant-Aid for Scientific Research on Innovative Areas “Chemistry for Multimolecular Crowding Biosystems” (JSPS KAKENHI Grand No. JP17H06353).

## **Author Information**

### **Corresponding Authors**

Ikuo Kurisaki - Graduate School of System Informatics, Kobe University, 1-1 Rokkodai, Nada-ku, Kobe 657-8501, Japan; ORCID: 0000-0003-4519-1093; Email:

kurisaki@bear.kobe-u.ac.jp

Shgenori Tanaka - Graduate School of System Informatics, Kobe University, 1-1

Rokkodai, Nada-ku, Kobe 657-8501, Japan; ORCID: 0000-0002-6659-2788; Email:

tanaka2@kobe-u.ac.jp

## **Notes**

The authors declare no competing financial interest.

## References

1. Chiti, F.; Dobson, C. M., Protein Misfolding, Amyloid Formation, and Human Disease: A Summary of Progress Over The Last Decade. *Annu. Rev.Biochem.* **2017**, *86*, 27-68.
2. Chiti, F.; Dobson, C. M., Protein Misfolding, Functional Amyloid, and Human Disease. *Ann. Rev. Biochem.* **2006**, *75*, 333-366.
3. Tolar, M.; Abushakra, S.; Sabbagh, M., The Path Forward in Alzheimer's Disease Therapeutics: Reevaluating the Amyloid Cascade Hypothesis. *Alzheimers Dement.* **2020**, *16*, 1553-1560.
4. Selkoe, D. J.; Hardy, J., The Amyloid Hypothesis of Alzheimer's Disease at 25years. *Embo Mol. Med.* **2016**, *8*, 595-608.
5. Knowles, T. P. J.; Waudby, C. A.; Devlin, G. L.; Cohen, S. I. A.; Aguzzi, A.; Vendruscolo, M.; Terentjev, E. M.; Welland, M. E.; Dobson, C. M., An Analytical Solution to the Kinetics of Breakable Filament Assembly. *Science* **2009**, *326*, 1533-1537.
6. Cohen, S. I. A.; Linse, S.; Luheshi, L. M.; Hellstrand, E.; White, D. A.; Rajah, L.; Otzen, D. E.; Vendruscolo, M.; Dobson, C. M.; Knowles, T. P. J., Proliferation of Amyloid- $\beta$  42 Aggregates Occurs through A Secondary Nucleation Mechanism. *P. Natl. Acad. Sci. USA* **2013**, *110*, 9758-9763.

7. Owen, M. C.; Gnutt, D.; Gao, M. M.; Warmlander, S. K. T. S.; Jarvet, J.; Graslund, A.; Winter, R.; Ebbinghaus, S.; Strodel, B., Effects of In Vivo Conditions on Amyloid Aggregation. *Chem. Soc. Rev.* **2019**, *48*, 3946-3996.
8. Harper, J. D.; Lansbury, P. T., Models of Amyloid Seeding in Alzheimer's Disease and Scrapie: Mechanistic Truths and Physiological Consequences of the Time-dependent Solubility of Amyloid Proteins. *Annu. Rev. Biochem.* **1997**, *66*, 385-407.
9. Ruggeri, F. S.; Sneideris, T.; Vendruscolo, M.; Knowles, T. P. J., Atomic Force Microscopy for Single Molecule Characterisation of Protein Aggregation. *Arch. Biochem. Biophys.* **2019**, *664*, 134-148.
10. Cohen, S. I. A.; Vendruscolo, M.; Dobson, C. M.; Knowles, T. P. J., From Macroscopic Measurements to Microscopic Mechanisms of Protein Aggregation. *J. Mol. Biol.* **2012**, *421*, 160-171.
11. Leppert, A.; Tiiman, A.; Kronqvist, N.; Landreh, M.; Abelein, A.; Vukojević, V.; Johansson, J., Smallest Secondary Nucleation Competent A $\beta$  Aggregates Probed by an ATP-Independent Molecular Chaperone Domain. *Biochemistry* **2021**, *60*, 678-688.
12. Novo, M.; Freire, S.; Al-Soufi, W., Critical Aggregation Concentration for The Formation of Early Amyloid- $\beta$  (1-42) Oligomers. *Sci Rep-Uk* **2018**, *8*. <https://doi.org/10.1038/s41598-018-19961-3>

13. Sabate, R.; Estelrich, J., Evidence of The Existence of Micelles in The Fibrillogenesis of  $\beta$ -amyloid Peptide. *J. Phys. Chem. B* **2005**, *109*, 11027-11032.
14. Colletier, J. P.; Laganowsky, A.; Landau, M.; Zhao, M.; Soriaga, A. B.; Goldschmidt, L.; Flot, D.; Cascio, D.; Sawaya, M. R.; Eisenberg, D., Molecular Basis for Amyloid- $\beta$  Polymorphism. *Proc. Natl. Acad. Sci. U S A* **2011**, *108*, 16938-43.
15. Hard, T., Protein Engineering to Stabilize Soluble Amyloid  $\beta$ -protein Aggregates for Structural and Functional Studies. *Febs J.* **2011**, *278*, 3884-3892.
16. De, S.; Wirthensohn, D. C.; Flagmeier, P.; Hughes, C.; Aprile, F. A.; Ruggeri, F. S.; Whiten, D. R.; Emin, D.; Xia, Z. J.; Varela, J. A.; Sormanni, P.; Kundel, F.; Knowles, T. P. J.; Dobson, C. M.; Bryant, C.; Vendruscolo, M.; Klenerman, D., Different Soluble Aggregates of A $\beta$ 42 Can Give Rise to Cellular Toxicity Through Different Mechanisms. *Nat. Commun.* **2019**, *10*. <https://doi.org/10.1038/s41467-019-09477-3>
17. Kollmer, M.; Close, W.; Funk, L.; Rasmussen, J.; Bsoul, A.; Schierhorn, A.; Schmidt, M.; Sigurdson, C. J.; Jucker, M.; Fandrich, M., Cryo-EM Structure and Polymorphism of A $\beta$  Amyloid Fibrils Purified from Alzheimer's Brain Tissue. *Nat. Commun.* **2019**, *10*. <https://doi.org/10.1038/s41467-019-12683-8>
18. Kurisaki, I.; Tanaka, S., ATP Converts A $\beta$ (42) Oligomer into Off-Pathway Species by Making Contact with Its Backbone Atoms Using Hydrophobic Adenosine. *J*

*Phys Chem B* **2019**, *123*, 9922-9933.

19. Wolff, M.; Zhang-Haagen, B.; Decker, C.; Barz, B.; Schneider, M.; Biehl, R.; Radulescu, A.; Strodel, B.; Willbold, D.; Nagel-Steger, L., A $\beta$ <sub>42</sub> Pentamers/Hexamers Are the Smallest Detectable Oligomers in Solution. *Sci. Rep.-Uk* **2017**, *7*.

<https://doi.org/10.1038/s41598-017-02370-3>

20. Gremer, L.; Scholzel, D.; Schenk, C.; Reinartz, E.; Labahn, J.; Ravelli, R. B. G.; Tusche, M.; Lopez-Iglesias, C.; Hoyer, W.; Heise, H.; Willbold, D.; Schroder, G. F., Fibril Structure of Amyloid- $\beta$ (1-42) by Cryo-electron Microscopy. *Science* **2017**, *358*, 116-119.

21. Maier, J. A.; Martinez, C.; Kasavajhala, K.; Wickstrom, L.; Hauser, K. E.; Simmerling, C., ff14SB: Improving the Accuracy of Protein Side Chain and Backbone Parameters from ff99SB. *J. Chem. Theory Comput.* **2015**, *11*, 3696-3713.

22. Jorgensen, W. L.; Chandrasekhar, J.; Madura, J. D.; Impey, R. W.; Klein, M. L., Comparison of Simple Potential Functions for Simulating Liquid Water. *J. Chem. Phys.* **1983**, *79*, 926-935.

23. Kusalik, P. G.; Svishchev, I. M., The Spatial Structure in Liquid Water. *Science* **1994**, *265*, 1219-1221.

24. Joung, I. S.; Cheatham, T. E., Determination of Alkali and Halide Monovalent Ion Parameters for Use in Explicitly Solvated Biomolecular Simulations. *J. Phys. Chem.*

*B* **2008**, *112*, 9020-9041.

25. Jung, I. S.; Cheatham, T. E., III, Molecular Dynamics Simulations of the Dynamic and Energetic Properties of Alkali and Halide Ions Using Water-Model-Specific Ion Parameters. *J. Phys. Chem. B* **2009**, *113*, 13279-13290.

26. Case, D. A.; Cerutti, D. S.; Cheatham, T. E., III ; Darden, T. A.; Duke, R. E.; Giese, T. J.; Gohlke, H.; Goetz, A. W.; Greene, D.; Homeyer, N.; Izadi, S.; Kovalenko, A.; Lee, T. S.; LeGrand, S.; Li, P.; Lin, C.; Liu, J.; Luchko, T.; Luo, R.; Mermelstein, D.; Merz, K. M.; Monard, G.; Nguyen, H.; Omelyan, I.; Onufriev, A.; Pan, F.; Qi, R.; Roe, D. R.; Roitberg, A.; Sagui, C.; Simmerling, C.; Botello-Smith, W. M.; Swails, J.; Walker, R. C.; Wang, J.; Wolf, R. M.; Wu, X.; Xiao, L.; York, D. M.; Kollman, P. A. *Amber 17*; University of California: San Francisco, CA, 2017.

27. Le Grand, S.; Gotz, A. W.; Walker, R. C., SPFP: Speed without Compromise-A Mixed Precision Model for GPU Accelerated Molecular Dynamics Simulations. *Comput. Phys. Commun.* **2013**, *184*, 374-380.

28. Berendsen, H. J. C.; Postma, J. P. M.; Vangunsteren, W. F.; Dinola, A.; Haak, J. R., Molecular-dynamics with Coupling to An External Bath. *J. Chem. Phys.* **1984**, *81*, 3684-3690.

29. Grossfield, A. *WHAM: the Weighted Histogram Analysis Method*, version 2.0.9;



University of Rochester Medical Center: Rochester, NY, 2013.

30. Kumar, S.; Bouzida, D.; Swendsen, R. H.; Kollman, P. A.; Rosenberg, J. M., The Weighted Histogram Analysis Method for Free-Energy Calculations on Biomolecules .1. The Method. *J. Comput. Chem.* **1992**, *13*, 1011-1021.
31. Hub, J. S.; de Groot, B. L.; van der Spoel, D., g\_wham-A Free Weighted Histogram Analysis Implementation Including Robust Error and Autocorrelation Estimates. *J. Chem. Theory Comput.* **2010**, *6*, 3713-3720.
32. Case, D. A., Dynamical Simulation of Rate Constants in Protein-Ligand Interactions. *Prog Biophys Mol Bio* **1988**, *52* (1), 39-70.
33. Zhou, H. X., Rate Theories for Biologists. *Q. Rev. Biophys.* **2010**, *43*, 219-293.
34. Humphrey, W.; Dalke, A.; Schulten, K., VMD: Visual Molecular Dynamics. *J. Mol. Graphics Modell.* **1996**, *14*, 33-38.
35. Roux, B.; Karplus, M., Ion-Transport in a Gramicidin-Like Channel - Dynamics and Mobility. *J. Phys. Chem.* **1991**, *95*, 4856-4868.
36. Dutzler, R.; Schirmer, T.; Karplus, M.; Fischer, S., Translocation Mechanism of Long Sugar Chains across The Maltoporin Membrane Channel. *Structure* **2002**, *10*, 1273-1284.
37. Hridya, V. M.; Hynes, J. T.; Mukherjee, A., Dynamical Recrossing in the

Intercalation Process of the Anticancer Agent Proflavine into DNA. *J. Phys. Chem. B* **2019**, *123*, 10904-10914.

38. Lomakin, A.; Chung, D. S.; Benedek, G. B.; Kirschner, D. A.; Teplow, D. B., On The Nucleation and Growth of Amyloid  $\beta$ -protein Fibrils: Detection of Nuclei and Quantitation of Rate Constants. *P. Natl. Acad. Sci. USA* **1996**, *93*, 1125-1129.

39. Glynn, C.; Sawaya, M. R.; Ge, P.; Gallagher-Jones, M.; Short, C. W.; Bowman, R.; Apostol, M.; Zhou, Z. H.; Eisenberg, D. S.; Rodriguez, J. A., Cryo-EM Structure of A Human Prion Fibril with A Hydrophobic, Protease-resistant Core. *Nat. Struct. Mol. Biol.* **2020**, *27*, 417-423.

40. Tuttle, M. D.; Comellas, G.; Nieuwkoop, A. J.; Covell, D. J.; Berthold, D. A.; Klopper, K. D.; Courtney, J. M.; Kim, J. K.; Barclay, A. M.; Kendall, A.; Wan, W.; Stubbs, G.; Schwieters, C. D.; Lee, V. M. Y.; George, J. M.; Rienstra, C. M., Solid-state NMR Structure of A Pathogenic Fibril of Full-length Human Alpha-synuclein. *Nat. Struct. Mol. Biol.* **2016**, *23*, 409-415.

41. Murray, D. T.; Kato, M.; Lin, Y.; Thurber, K. R.; Hung, I.; McKnight, S. L.; Tycko, R., Structure of FUS Protein Fibrils and Its Relevance to Self-Assembly and Phase Separation of Low-Complexity Domains. *Cell* **2017**, *171*, 615-627.e16.

## For TOC graphics only

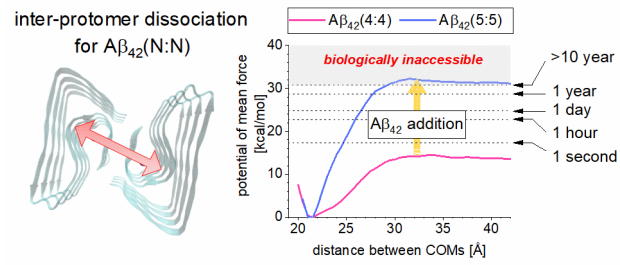

Source: https://www.biorxiv.org/content/10.1101/2021.02.12.431048v4.full.pdf
